# Supplementary material for: Structure–activity relationship expansion and microsomal stability assessment of the 2-morpholinobenzoic acid scaffold as antiproliferative phosphatidylcholine-specific phospholipase C inhibitors
Source: Royal Society of Chemistry journal article supplement (doi:10.1039/d4md00831f), 2025-01-01
Supplement: d4md00831f2.pdf [file d4md00831f2.pdf]

# Structure-activity relationship expansion and microsomal stability assessment of the 2-morpholinobenzoic acid scaffold as antiproliferative phosphatidylcholine-specific phospholipase C inhibitors

## Supplementary Information Part 2: *In silico* experimental results

Shaun W. P. Rees<sup>a</sup>, Tayla A. Rees<sup>b,c</sup>, Emily K. Paulin<sup>a</sup>, Olivia R. Arnerich<sup>a,d</sup>, Euphemia Leung<sup>c,e</sup>, Christopher S. Walker<sup>b,c</sup>, David Barker<sup>a,d\*</sup>, Lisa I. Pilkington<sup>a,f\*</sup>

<sup>a</sup> School of Chemical Sciences, University of Auckland, Auckland 1010, New Zealand

<sup>b</sup> School of Biological Sciences, University of Auckland, Auckland 1010, New Zealand

<sup>c</sup> Maurice Wilkins Centre for Molecular Biodiscovery, University of Auckland, Auckland 1010, New Zealand.

<sup>d</sup> MacDiarmid Institute for Advanced Materials and Nanotechnology, Wellington, New Zealand

<sup>e</sup> Auckland Cancer Society Research Centre, University of Auckland, Grafton, Auckland 1023, New Zealand

<sup>f</sup> Te Pūnaha Matatini, Auckland 1142, New Zealand.

\*Corresponding author. Email: [d.barker@auckland.ac.nz](mailto:d.barker@auckland.ac.nz) (D.B), [lisa.pilkington@auckland.ac.nz](mailto:lisa.pilkington@auckland.ac.nz) (L.I.P).

### Table of Contents:

|                                                                                                                                  |     |
|----------------------------------------------------------------------------------------------------------------------------------|-----|
| Molecular modelling scores of synthesised compounds.....                                                                         | S2  |
| Binding poses of selected compounds <b>1a</b> , <b>11e</b> , and <b>20e</b> within the active site of PC-PLC <sub>BC</sub> ..... | S5  |
| Tanimoto similarity coefficients of hydroxamic acid-containing compounds.....                                                    | S7  |
| ADMET data of all synthesised compounds .....                                                                                    | S9  |
| References .....                                                                                                                 | S16 |

### List of Tables

|                                                                                                                            |     |
|----------------------------------------------------------------------------------------------------------------------------|-----|
| <b>Table S1.</b> Docking scores of series <b>10</b> compounds (1,2,4-carboxylic esters) .....                              | S2  |
| <b>Table S2.</b> Docking scores of series <b>11</b> compounds (1,2,4-carboxylic acids) .....                               | S2  |
| <b>Table S3.</b> Docking scores of series <b>12</b> compounds (1,2,4-hydroxamic acids). .....                              | S3  |
| <b>Table S4.</b> Docking scores of series <b>19</b> compounds (THP esters). .....                                          | S3  |
| <b>Table S5.</b> Docking scores of series <b>20</b> compounds (THP carboxylic acids) .....                                 | S3  |
| <b>Table S6.</b> Docking scores of series <b>21</b> compounds (THP carboxylic acids) .....                                 | S4  |
| <b>Table S7.</b> Docking scores of <i>N</i> -methylated compounds and positive control D609 .....                          | S4  |
| <b>Table S8.</b> Tanimoto scores of series <b>12</b> compounds compared to known HDAC inhibitors. ....                     | S7  |
| <b>Table S9.</b> Tanimoto scores of series <b>21</b> compounds compared to known HDAC inhibitors .....                     | S8  |
| <b>Table S10.</b> Computed physicochemical properties of all synthesised compounds .....                                   | S10 |
| <b>Table S11.</b> Scores of common ADMET properties calculated for all synthesised compounds. ....                         | S12 |
| <b>Table S12.</b> Interactions and distances between <b>1b</b> and PC-PLC <sub>BC</sub> .....                              | S14 |
| <b>Table S13.</b> Interactions and distances between <b>1b</b> and active waters of PC-PLC <sub>BC</sub> .....             | S15 |
| <b>Table S14.</b> Interactions and distances between <b>20h</b> and PC-PLC <sub>BC</sub> as compared with <b>1b</b> . .... | S15 |
| <b>Table S15.</b> Interactions and distances between <b>20h</b> and active waters of PC-PLC <sub>BC</sub> .....            | S16 |

## List of Figures

|                                                                                                                     |     |
|---------------------------------------------------------------------------------------------------------------------|-----|
| <b>Figure S1.</b> Predicted binding pose of compound <b>1a</b> within the active site of PC-PLC <sub>BC</sub> ..... | S5  |
| <b>Figure S2.</b> Predicted binding pose of 2-morpholinobenzoic acid derivatives .....                              | S6  |
| <b>Figure S3.</b> Structures of FDA-approved HDAC inhibitors. ....                                                  | S7  |
| <b>Figure S4.</b> Comparison of binding conformations with alkyl ring modification. ....                            | S14 |
| <b>Figure S5.</b> Interactions and distances between <b>1b</b> and PC-PLC <sub>BC</sub> . ....                      | S14 |
| <b>Figure S6.</b> Interactions and distances between <b>20h</b> and PC-PLC <sub>BC</sub> . ....                     | S15 |

## Molecular modelling scores of synthesised compounds

Goldscore van der Waals (vdW) and hydrogen bonding (Hbond) scores are weighted terms in all tables.

**Table S1.** Docking scores of series **10** compounds (1,2,4-carboxylic esters) using genetic algorithms available in GOLD suite.

| Compound           | ChemPLP |       |       | Goldscore |       |       | Chemscore |            |       | ASP     |
|--------------------|---------|-------|-------|-----------|-------|-------|-----------|------------|-------|---------|
|                    | Fitness | Hbond | Metal | Fitness   | vdW   | Hbond | Fitness   | $\Delta G$ | Hbond | Fitness |
| H ( <b>a</b> )     | 74.97   | 1.00  | 1.00  | 60.99     | 45.69 | 19.83 | 32.73     | -38.07     | -2.11 | 42.09   |
| 2-F ( <b>b</b> )   | 72.14   | 1.00  | 1.00  | 54.24     | 50.08 | 6.47  | 31.57     | -33.37     | -3.32 | 46.83   |
| 3-F ( <b>c</b> )   | 79.13   | 0.00  | 1.74  | 56.51     | 54.47 | 4.79  | 30.87     | -39.04     | 0.00  | 45.90   |
| 4-F ( <b>d</b> )   | 78.56   | 0.00  | 1.73  | 55.83     | 53.40 | 4.85  | 33.17     | -35.67     | -2.14 | 45.70   |
| 2-Cl ( <b>e</b> )  | 72.62   | 0.96  | 0.99  | 57.18     | 53.63 | 5.73  | 33.48     | -34.59     | -3.27 | 42.54   |
| 3-Cl ( <b>f</b> )  | 74.65   | 0.00  | 1.85  | 58.10     | 54.56 | 5.24  | 33.06     | -37.57     | -2.21 | 44.13   |
| 4-Cl ( <b>g</b> )  | 72.64   | 0.33  | 1.00  | 56.62     | 48.98 | 10.45 | 32.56     | -39.50     | 0.00  | 44.45   |
| 2-Br ( <b>h</b> )  | 74.46   | 0.98  | 1.00  | 58.44     | 50.04 | 12.68 | 31.44     | -33.67     | -2.83 | 41.53   |
| 3-Br ( <b>i</b> )  | 80.33   | 0.00  | 1.93  | 57.92     | 49.98 | 11.30 | 33.71     | -40.60     | 0.00  | 44.78   |
| 4-Br ( <b>j</b> )  | 78.70   | 0.00  | 1.92  | 54.73     | 44.55 | 14.34 | 33.55     | -40.50     | 0.00  | 43.92   |
| 2-OMe ( <b>k</b> ) | 73.08   | 0.33  | 1.00  | 56.81     | 54.61 | 5.21  | 32.26     | -33.26     | -3.24 | 44.77   |
| 3-OMe ( <b>l</b> ) | 79.88   | 0.00  | 1.89  | 59.14     | 53.73 | 10.70 | 34.12     | -37.80     | -4.09 | 46.00   |
| 4-OMe ( <b>m</b> ) | 78.86   | 0.67  | 1.21  | 53.88     | 48.79 | 8.91  | 30.79     | -38.72     | 0.00  | 46.93   |

**Table S2.** Docking scores of series **11** compounds (1,2,4-carboxylic acids) using genetic algorithms available in GOLD suite.

| Compound           | ChemPLP |       |       | Goldscore |       |       | Chemscore |            |       | ASP     |
|--------------------|---------|-------|-------|-----------|-------|-------|-----------|------------|-------|---------|
|                    | Fitness | Hbond | Metal | Fitness   | vdW   | Hbond | Fitness   | $\Delta G$ | Hbond | Fitness |
| H ( <b>a</b> )     | 115.92  | 1.00  | 7.81  | 83.69     | 41.16 | 46.32 | 44.44     | -54.87     | -3.33 | 49.05   |
| 2-F ( <b>b</b> )   | 111.01  | 1.30  | 7.82  | 82.84     | 40.42 | 46.46 | 43.08     | -53.62     | -3.34 | 47.22   |
| 3-F ( <b>c</b> )   | 115.55  | 1.00  | 7.82  | 82.99     | 40.67 | 46.68 | 42.62     | -52.80     | -3.34 | 48.88   |
| 4-F ( <b>d</b> )   | 116.56  | 1.00  | 7.82  | 81.68     | 39.49 | 46.30 | 44.15     | -53.47     | -3.34 | 48.49   |
| 2-Cl ( <b>e</b> )  | 116.76  | 1.00  | 7.87  | 82.09     | 41.02 | 46.03 | 45.81     | -56.35     | -5.28 | 50.01   |
| 3-Cl ( <b>f</b> )  | 117.10  | 1.00  | 7.78  | 81.87     | 40.25 | 46.74 | 44.17     | -54.76     | -3.34 | 48.01   |
| 4-Cl ( <b>g</b> )  | 117.63  | 1.00  | 7.86  | 81.98     | 42.48 | 45.57 | 43.40     | -53.25     | -3.71 | 47.92   |
| 2-Br ( <b>h</b> )  | 114.26  | 1.00  | 7.82  | 83.13     | 44.35 | 47.86 | 45.38     | -54.34     | -3.34 | 42.07   |
| 3-Br ( <b>i</b> )  | 116.05  | 1.00  | 7.84  | 85.50     | 43.23 | 46.45 | 44.55     | -53.67     | -3.34 | 48.43   |
| 4-Br ( <b>j</b> )  | 117.80  | 1.00  | 7.78  | 80.36     | 40.57 | 46.99 | 43.82     | -55.61     | -3.28 | 46.94   |
| 2-OMe ( <b>k</b> ) | 114.07  | 0.99  | 7.88  | 84.95     | 42.43 | 46.44 | 43.30     | -53.15     | -3.34 | 48.98   |
| 3-OMe ( <b>l</b> ) | 114.35  | 1.00  | 7.87  | 84.76     | 41.54 | 47.04 | 43.29     | -53.92     | -3.32 | 51.02   |
| 4-OMe ( <b>m</b> ) | 118.27  | 1.00  | 7.90  | 84.01     | 44.31 | 46.33 | 44.46     | -54.53     | -3.33 | 49.02   |

**Table S3.** Docking scores of series **12** compounds (1,2,4-hydroxamic acids) using genetic algorithms available in GOLD suite.

| Compound  | ChemPLP |       |       | Goldscore |       |       | Chemscore |            |       | ASP     |
|-----------|---------|-------|-------|-----------|-------|-------|-----------|------------|-------|---------|
|           | Fitness | Hbond | Metal | Fitness   | vdW   | Hbond | Fitness   | $\Delta G$ | Hbond | Fitness |
| H (a)     | 89.82   | 0.02  | 2.95  | 81.08     | 53.98 | 29.15 | 48.25     | -57.48     | -9.56 | 64.73   |
| 2-F (b)   | 92.57   | 1.30  | 2.53  | 79.08     | 48.63 | 35.19 | 45.85     | -54.78     | -7.40 | 69.66   |
| 3-F (c)   | 89.90   | 0.75  | 2.62  | 80.03     | 48.82 | 35.56 | 45.69     | -54.56     | -6.46 | 69.79   |
| 4-F (d)   | 98.85   | 1.48  | 2.22  | 78.70     | 47.71 | 35.80 | 47.80     | -55.66     | -6.04 | 70.63   |
| 2-Cl (e)  | 95.69   | 1.00  | 2.72  | 81.31     | 54.15 | 30.88 | 48.34     | -57.12     | -8.75 | 68.99   |
| 3-Cl (f)  | 94.12   | 1.02  | 2.73  | 80.23     | 49.21 | 36.00 | 46.90     | -56.24     | -6.39 | 68.13   |
| 4-Cl (g)  | 94.47   | 0.81  | 2.64  | 80.60     | 49.19 | 35.87 | 48.56     | -56.89     | -7.73 | 67.72   |
| 2-Br (h)  | 89.84   | 1.15  | 2.94  | 79.18     | 48.98 | 34.50 | 47.55     | -55.23     | -6.76 | 68.17   |
| 3-Br (i)  | 95.56   | 1.01  | 2.63  | 80.24     | 50.68 | 34.38 | 45.55     | -55.29     | -6.43 | 67.65   |
| 4-Br (j)  | 95.56   | 1.01  | 2.63  | 80.24     | 50.68 | 34.38 | 45.55     | -55.29     | -6.43 | 67.65   |
| 2-OMe (k) | 90.28   | 0.53  | 2.95  | 78.65     | 48.45 | 34.78 | 48.12     | -55.81     | -8.58 | 68.62   |
| 3-OMe (l) | 97.35   | 1.33  | 2.42  | 81.27     | 50.27 | 35.35 | 46.07     | -57.13     | -8.84 | 68.87   |
| 4-OMe (m) | 90.80   | 0.64  | 2.34  | 78.95     | 50.28 | 32.90 | 46.31     | -56.26     | -6.76 | 66.76   |

**Table S4.** Docking scores of series **19** compounds (THP esters) using genetic algorithms available in GOLD suite.

| Compound  | ChemPLP |       |       | Goldscore |       |       | Chemscore |            |       | ASP     |
|-----------|---------|-------|-------|-----------|-------|-------|-----------|------------|-------|---------|
|           | Fitness | Hbond | Metal | Fitness   | vdW   | Hbond | Fitness   | $\Delta G$ | Hbond | Fitness |
| H (a)     | 72.05   | 1.00  | 0.00  | 60.74     | 52.59 | 11.99 | 30.71     | -33.76     | -3.31 | 46.01   |
| 2-F (b)   | 74.44   | 0.97  | 0.00  | 60.14     | 52.46 | 11.96 | 32.05     | -34.01     | -4.01 | 47.20   |
| 3-F (c)   | 75.46   | 1.00  | 0.00  | 61.19     | 54.27 | 10.67 | 32.08     | -35.71     | -2.18 | 46.11   |
| 4-F (d)   | 75.15   | 1.00  | 0.00  | 61.74     | 53.94 | 11.00 | 33.06     | -34.85     | -6.01 | 45.72   |
| 2-Cl (e)  | 71.96   | 0.00  | 1.97  | 62.90     | 56.40 | 11.23 | 34.90     | -38.00     | -3.88 | 41.91   |
| 3-Cl (f)  | 71.99   | 0.96  | 0.00  | 62.91     | 55.41 | 11.70 | 33.81     | -38.73     | -1.08 | 45.00   |
| 4-Cl (g)  | 72.64   | 1.00  | 0.00  | 58.46     | 52.25 | 11.12 | 34.40     | -37.66     | -4.01 | 46.84   |
| 2-Br (h)  | 71.20   | 0.00  | 1.93  | 62.81     | 59.92 | 8.54  | 34.44     | -37.89     | -3.98 | 40.59   |
| 3-Br (i)  | 74.62   | 1.00  | 0.00  | 62.26     | 54.72 | 12.21 | 33.70     | -36.05     | -4.65 | 45.67   |
| 4-Br (j)  | 73.57   | 1.00  | 0.00  | 64.29     | 54.86 | 12.88 | 33.70     | -38.15     | -1.11 | 45.26   |
| 2-OMe (k) | 70.71   | 0.00  | 1.94  | 61.00     | 55.29 | 9.21  | 32.06     | -33.62     | -4.09 | 41.81   |
| 3-OMe (l) | 73.37   | 0.95  | 0.00  | 61.13     | 55.09 | 11.31 | 34.45     | -36.76     | -5.73 | 47.93   |
| 4-OMe (m) | 74.17   | 1.00  | 0.00  | 58.01     | 56.23 | 5.37  | 28.69     | -30.01     | -3.18 | 49.60   |

**Table S5.** Docking scores of series **20** compounds (THP carboxylic acids) using genetic algorithms available in GOLD suite.

| Compound  | ChemPLP |       |       | Goldscore |       |       | Chemscore |            |       | ASP     |
|-----------|---------|-------|-------|-----------|-------|-------|-----------|------------|-------|---------|
|           | Fitness | Hbond | Metal | Fitness   | vdW   | Hbond | Fitness   | $\Delta G$ | Hbond | Fitness |
| H (a)     | 111.43  | 1.90  | 7.65  | 68.87     | 35.14 | 37.87 | 39.93     | -52.65     | -3.62 | 44.96   |
| 2-F (b)   | 109.20  | 1.72  | 6.93  | 77.08     | 41.89 | 39.39 | 40.40     | -52.12     | -4.29 | 49.11   |
| 3-F (c)   | 109.60  | 1.14  | 6.16  | 80.71     | 44.77 | 38.73 | 38.72     | -49.49     | -3.89 | 48.93   |
| 4-F (d)   | 111.92  | 1.78  | 6.93  | 71.14     | 38.99 | 36.40 | 40.25     | -54.34     | -3.88 | 48.81   |
| 2-Cl (e)  | 104.38  | 1.10  | 7.55  | 85.65     | 50.26 | 38.82 | 40.17     | -52.50     | -4.14 | 48.09   |
| 3-Cl (f)  | 111.47  | 1.84  | 5.79  | 78.60     | 44.72 | 37.58 | 43.12     | -54.42     | -4.84 | 48.53   |
| 4-Cl (g)  | 107.92  | 1.06  | 6.44  | 81.06     | 42.14 | 42.72 | 42.05     | -55.77     | -4.36 | 48.31   |
| 2-Br (h)  | 109.76  | 1.49  | 7.38  | 82.16     | 48.77 | 40.61 | 42.98     | -57.16     | -4.50 | 44.88   |
| 3-Br (i)  | 111.44  | 1.76  | 7.53  | 79.40     | 45.20 | 38.22 | 42.01     | -55.03     | -3.35 | 47.35   |
| 4-Br (j)  | 110.79  | 1.71  | 6.72  | 78.73     | 44.10 | 39.31 | 42.86     | -57.49     | -5.44 | 48.52   |
| 2-OMe (k) | 105.31  | 1.53  | 6.28  | 83.75     | 44.70 | 40.83 | 38.22     | -50.66     | -5.49 | 46.66   |
| 3-OMe (l) | 112.86  | 1.65  | 6.22  | 75.71     | 42.92 | 36.43 | 40.13     | -52.39     | -3.58 | 45.42   |
| 4-OMe (m) | 107.64  | 1.38  | 5.71  | 83.21     | 46.04 | 39.63 | 40.19     | -51.31     | -5.90 | 49.35   |

**Table S6.** Docking scores of series **21** compounds (THP carboxylic acids) using genetic algorithms available in GOLD suite.

| Compound           | ChemPLP |       |       | Goldscore |       |       | Chemscore |            |       | ASP     |
|--------------------|---------|-------|-------|-----------|-------|-------|-----------|------------|-------|---------|
|                    | Fitness | Hbond | Metal | Fitness   | vdW   | Hbond | Fitness   | $\Delta G$ | Hbond | Fitness |
| H ( <b>a</b> )     | 102.01  | 1.42  | 2.79  | 71.65     | 46.93 | 29.56 | 50.37     | -58.68     | -8.82 | 70.54   |
| 2-F ( <b>b</b> )   | 101.58  | 1.62  | 2.57  | 76.94     | 53.72 | 30.14 | 45.72     | -56.61     | -8.14 | 71.01   |
| 3-F ( <b>c</b> )   | 102.03  | 1.52  | 2.84  | 76.48     | 53.24 | 29.41 | 46.55     | -57.01     | -7.72 | 71.74   |
| 4-F ( <b>d</b> )   | 105.99  | 1.70  | 2.87  | 76.58     | 53.01 | 29.49 | 48.03     | -56.65     | -7.86 | 70.66   |
| 2-Cl ( <b>e</b> )  | 99.21   | 1.87  | 2.54  | 79.16     | 55.64 | 25.89 | 51.31     | -59.96     | -9.00 | 68.16   |
| 3-Cl ( <b>f</b> )  | 101.43  | 2.31  | 3.14  | 76.92     | 54.98 | 28.85 | 49.64     | -57.25     | -7.06 | 69.81   |
| 4-Cl ( <b>g</b> )  | 102.00  | 1.56  | 2.77  | 86.72     | 53.84 | 35.90 | 51.58     | -60.61     | -9.16 | 71.34   |
| 2-Br ( <b>h</b> )  | 99.38   | 1.80  | 2.74  | 79.17     | 52.64 | 31.10 | 47.80     | -58.78     | -7.66 | 69.55   |
| 3-Br ( <b>i</b> )  | 103.02  | 1.58  | 2.84  | 76.22     | 50.63 | 29.99 | 48.24     | -58.44     | -8.41 | 70.13   |
| 4-Br ( <b>j</b> )  | 102.11  | 1.63  | 2.72  | 84.94     | 53.34 | 36.42 | 50.62     | -58.12     | -7.21 | 70.24   |
| 2-OMe ( <b>k</b> ) | 95.12   | 2.24  | 3.09  | 85.56     | 55.28 | 36.86 | 45.80     | -57.31     | -7.75 | 68.66   |
| 3-OMe ( <b>l</b> ) | 98.99   | 1.63  | 2.91  | 91.78     | 57.95 | 36.38 | 47.37     | -56.25     | -6.78 | 69.24   |
| 4-OMe ( <b>m</b> ) | 104.80  | 1.98  | 2.54  | 86.73     | 54.44 | 34.78 | 46.31     | -56.26     | -6.76 | 72.14   |

**Table S7.** Docking scores of *N*-methylated compounds and positive control D609 using genetic algorithms available in GOLD suite.

| Compound            | ChemPLP |        |       | Goldscore |       |       | Chemscore |            |        | ASP     |
|---------------------|---------|--------|-------|-----------|-------|-------|-----------|------------|--------|---------|
|                     | Fitness | H bond | Metal | Fitness   | vdW   | Hbond | Fitness   | $\Delta G$ | H bond | Fitness |
| D609                | 63.46   | 0.97   | 3.85  | 89.34     | 41.56 | 49.73 | 35.11     | -38.69     | -3.32  | 27.55   |
| CA ( <b>24</b> )    | 108.74  | 1.87   | 7.23  | 81.98     | 49.95 | 37.71 | 42.60     | -49.84     | -18.96 | 46.20   |
| Ester ( <b>23</b> ) | 76.09   | 0.00   | 2.91  | 60.29     | 49.61 | 12.75 | 33.45     | -42.93     | 0.00   | 41.53   |
| HA ( <b>25</b> )    | 97.14   | 2.00   | 2.48  | 73.20     | 50.25 | 27.16 | 47.59     | -60.17     | -9.00  | 67.76   |

CA = carboxylic acid, HA = hydroxamic acid

Binding poses of selected compounds **1a**, **11e**, and **20e** within the active site of PC-PLC<sub>BC</sub>

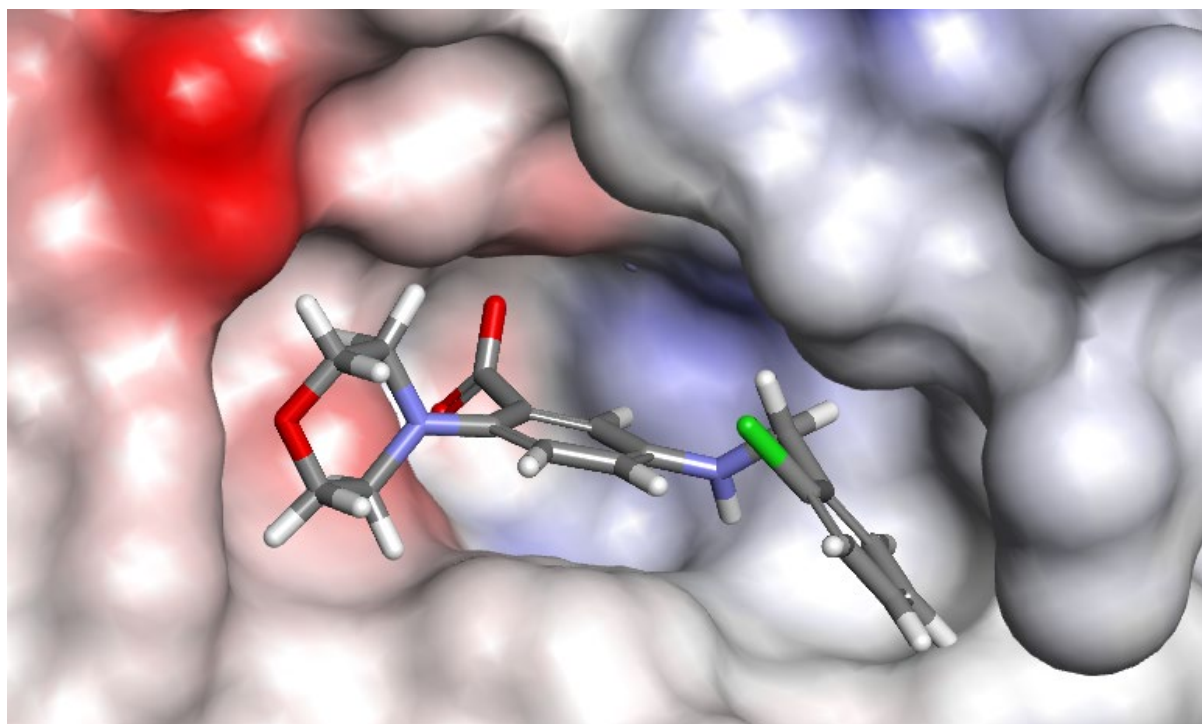

**Figure S1.** Predicted binding pose of compound **1a** within the active site of PC-PLC<sub>BC</sub> (PDB ID: 1AH7, 1.50 Å)<sup>1</sup> represented by a solvent ionizability surface. Blue areas represent basic residues, red areas represent acidic residues and white indicates neutral. Compound **1a** is represented by stick structure coloured by atom type.

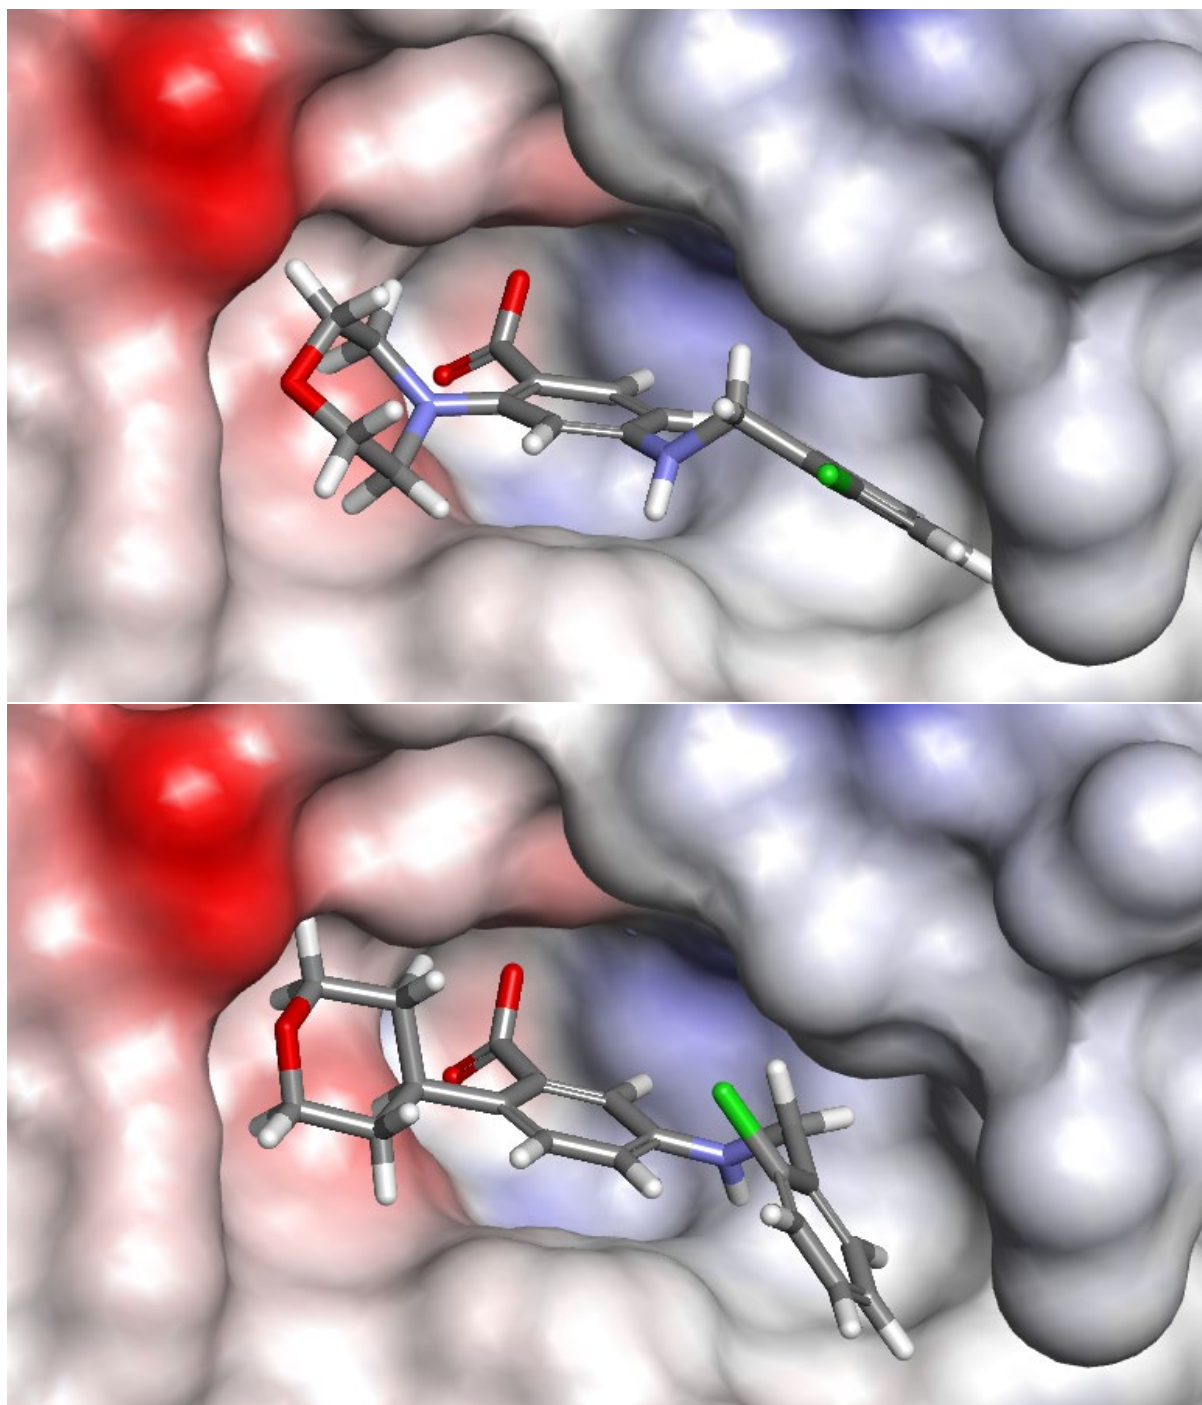

**Figure S2.** Predicted binding pose of 2-morpholinobenzoic acid derivatives within the active site of PC-PLC<sub>β</sub> (PDB ID: 1AH7, 1.50 Å)<sup>1</sup> represented by a solvent ionizability surface. Blue areas represent basic residues, red areas represent acidic residues and white indicates neutral. *Top*: Compound **11e**; *bottom*: compound **20e**.

### Tanimoto similarity coefficients of hydroxamic acid-containing compounds

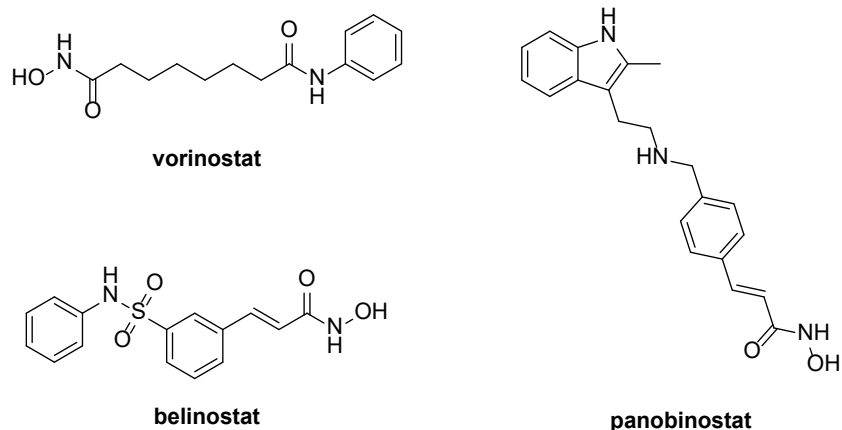

**Figure S3.** Structures of FDA-approved HDAC inhibitors.<sup>2</sup>

**Table S8.** Tanimoto scores of series **12** compounds compared to known HDAC inhibitors representing structural similarity. A score of 0 indicates no similarity and 1 indicates identical molecules. Values were calculated using R Statistical Software (v4.4.2) and the rcdk R package (v3.8.1).<sup>3,4</sup>

| Compound            | Tanimoto Score |            |              |
|---------------------|----------------|------------|--------------|
|                     | Vorinostat     | Belinostat | Panobinostat |
| <b>12a</b>          | 0.241          | 0.188      | 0.155        |
| <b>12b</b>          | 0.202          | 0.170      | 0.130        |
| <b>12c</b>          | 0.169          | 0.154      | 0.127        |
| <b>12d</b>          | 0.163          | 0.137      | 0.152        |
| <b>12e</b>          | 0.198          | 0.167      | 0.128        |
| <b>12f</b>          | 0.182          | 0.154      | 0.127        |
| <b>12g</b>          | 0.179          | 0.150      | 0.153        |
| <b>12h</b>          | 0.188          | 0.182      | 0.130        |
| <b>12i</b>          | 0.170          | 0.155      | 0.128        |
| <b>12j</b>          | 0.163          | 0.137      | 0.142        |
| <b>12k</b>          | 0.191          | 0.162      | 0.144        |
| <b>12l</b>          | 0.187          | 0.159      | 0.132        |
| <b>12m</b>          | 0.170          | 0.133      | 0.148        |
| Summary statistics  |                |            |              |
| Min                 | 0.163          | 0.133      | 0.127        |
| 1 <sup>st</sup> Qu. | 0.171          | 0.150      | 0.128        |
| Median              | 0.182          | 0.155      | 0.132        |
| Mean                | 0.185          | 0.158      | 0.138        |
| 3 <sup>rd</sup> Qu. | 0.191          | 0.167      | 0.148        |
| Max                 | 0.241          | 0.188      | 0.155        |

**Table S9.** Tanimoto scores of series **21** compounds compared to known HDAC inhibitors representing structural similarity. A score of 0 indicates no similarity and 1 indicates identical molecules. Values were calculated using R Statistical Software (v4.4.2) and the rcdk R package (v3.8.1).

| Compound            | Tanimoto Score |            |              |
|---------------------|----------------|------------|--------------|
|                     | Vorinostat     | Belinostat | Panobinostat |
| <b>21a</b>          | 0.188          | 0.186      | 0.143        |
| <b>21b</b>          | 0.167          | 0.170      | 0.121        |
| <b>21c</b>          | 0.161          | 0.152      | 0.117        |
| <b>21d</b>          | 0.195          | 0.136      | 0.140        |
| <b>21e</b>          | 0.182          | 0.165      | 0.118        |
| <b>21f</b>          | 0.174          | 0.154      | 0.118        |
| <b>21g</b>          | 0.184          | 0.147      | 0.140        |
| <b>21h</b>          | 0.169          | 0.178      | 0.119        |
| <b>21i</b>          | 0.161          | 0.154      | 0.118        |
| <b>21j</b>          | 0.187          | 0.136      | 0.130        |
| <b>21k</b>          | 0.185          | 0.159      | 0.132        |
| <b>21l</b>          | 0.169          | 0.157      | 0.122        |
| <b>21m</b>          | 0.169          | 0.132      | 0.137        |
| Summary statistics  |                |            |              |
| Min                 | 0.161          | 0.132      | 0.117        |
| 1 <sup>st</sup> Qu. | 0.169          | 0.147      | 0.118        |
| Median              | 0.182          | 0.154      | 0.122        |
| Mean                | 0.181          | 0.156      | 0.127        |
| 3 <sup>rd</sup> Qu. | 0.187          | 0.165      | 0.137        |
| Max                 | 0.238          | 0.186      | 0.143        |



## ADMET data of all synthesised compounds

Physicochemical properties that have been linked to favourable drug profiles were calculated using ADMETlab 3.0<sup>5</sup> and the results are reported in table S6, SI part 2. All compounds satisfied Lipinski and Veber criteria of drug-likeness and no compounds were identified as pan-assay interference compounds (PAINS).<sup>6-9</sup> The criteria for drug-likeness required molecular weights of  $\leq 500$  Da,  $\log P \leq 5$ , hydrogen bond donors  $\leq 5$ , and hydrogen bond acceptors  $\leq 10$  to satisfy Lipinski's rules.<sup>7,8</sup> Veber contributed new criteria of rotatable bonds  $\leq 10$ , and polar surface area  $\leq 140 \text{ \AA}^2$ .<sup>9</sup>

$\log D_{7.4}$  was included to represent distribution at physiological pH, which is particularly relevant for compounds containing carboxylic acid motifs. Calculations of pKa were first carried out and it was found that all of series **11** and **20** compounds values were  $< 7.4$ , indicating these compounds are in an ionised state under physiological conditions and therefore the  $\log D$  value should be considered over  $\log P$  when evaluating ADMET profiles.

All compounds satisfied lipophilicity criteria (all values  $< 5$ ) when considering both  $\log P$  and  $\log D$ . Additional criteria for  $\log S$  and  $\log D$  were considered from more literary references to define optimal space in these areas, being  $-1$  to  $-5$  for  $\log S$ <sup>10</sup> and  $1$  to  $3$  for  $\log D$ <sup>11</sup>. Compounds falling outside of these ranges are indicated by <sup>a</sup> in table S6. Violations of the range for  $\log D$  was shown in series **10** and **19**, with values  $> 3$ , but only to a maximum of  $3.61$  for compound **10e** and  $3.79$  for **19j**. None of these compounds had pKa values less than pH  $7.4$  so  $\log D$  requirements are of lesser relevance in these cases but are lower, and therefore more favourable, than their  $\log P$  values.  $\log S$  criteria were not met in **12j** and seven of the series **19** compounds (**19c**, **19e-j**), these results are more varied but mostly include THP methyl esters. The 4-bromo substituent also appears to be less favourable for drug-likeness owing to higher lipophilicity and lower aqueous solubility, but this was not the case in all of the synthesised series. It is worth noting that these ranges are considered optimal regions based off known drugs, and greater variability is tolerated for earlier stages in the drug development process.

**Table S10.** Computed physicochemical properties of all synthesised compounds which fall under Lipinski-veber criteria of drug-like compounds.<sup>8,9</sup> Values were calculated using ADMETlab 3.0.<sup>5</sup>

| Compound   | MW (Da) | nHA | nHD | TPSA (Å <sup>2</sup> ) | nRot | logS               | logD              | logP |
|------------|---------|-----|-----|------------------------|------|--------------------|-------------------|------|
| <b>10a</b> | 326.16  | 5   | 1   | 50.8                   | 6    | -3.96              | 3.30 <sup>a</sup> | 3.34 |
| <b>10b</b> | 344.15  | 5   | 1   | 50.8                   | 6    | -4.44              | 3.54 <sup>a</sup> | 3.75 |
| <b>10c</b> | 344.15  | 5   | 1   | 50.8                   | 6    | -4.62              | 3.36 <sup>a</sup> | 3.68 |
| <b>10d</b> | 344.15  | 5   | 1   | 50.8                   | 6    | -4.55              | 3.33 <sup>a</sup> | 3.60 |
| <b>10e</b> | 360.12  | 5   | 1   | 50.8                   | 6    | -4.58              | 3.61 <sup>a</sup> | 3.89 |
| <b>10f</b> | 360.12  | 5   | 1   | 50.8                   | 6    | -4.81              | 3.54 <sup>a</sup> | 3.99 |
| <b>10g</b> | 360.12  | 5   | 1   | 50.8                   | 6    | -4.89              | 3.48 <sup>a</sup> | 4.03 |
| <b>10h</b> | 404.07  | 5   | 1   | 50.8                   | 6    | -4.38              | 3.54 <sup>a</sup> | 3.89 |
| <b>10i</b> | 404.07  | 5   | 1   | 50.8                   | 6    | -4.76              | 3.40 <sup>a</sup> | 3.97 |
| <b>10j</b> | 404.07  | 5   | 1   | 50.8                   | 6    | -4.97              | 3.36 <sup>a</sup> | 4.01 |
| <b>10k</b> | 356.17  | 6   | 1   | 60.03                  | 7    | -4.21              | 3.38 <sup>a</sup> | 3.38 |
| <b>10l</b> | 356.17  | 6   | 1   | 60.03                  | 7    | -4.14              | 3.22 <sup>a</sup> | 3.31 |
| <b>10m</b> | 356.17  | 6   | 1   | 60.03                  | 7    | -4.08              | 3.13 <sup>a</sup> | 3.26 |
| <b>11a</b> | 312.15  | 5   | 2   | 61.8                   | 5    | -3.35              | 2.32              | 3.12 |
| <b>11b</b> | 330.14  | 5   | 2   | 61.8                   | 5    | -3.90              | 2.64              | 3.28 |
| <b>11c</b> | 330.14  | 5   | 2   | 61.8                   | 5    | -3.92              | 2.70              | 3.39 |
| <b>11d</b> | 330.14  | 5   | 2   | 61.8                   | 5    | -3.94              | 2.64              | 3.24 |
| <b>11e</b> | 346.11  | 5   | 2   | 61.8                   | 5    | -3.86              | 2.60              | 3.79 |
| <b>11f</b> | 346.11  | 5   | 2   | 61.8                   | 5    | -3.88              | 2.60              | 3.89 |
| <b>11g</b> | 346.11  | 5   | 2   | 61.8                   | 5    | -3.96              | 2.52              | 3.91 |
| <b>11h</b> | 390.06  | 5   | 2   | 61.8                   | 5    | -3.80              | 2.56              | 3.76 |
| <b>11i</b> | 390.06  | 5   | 2   | 61.8                   | 5    | -3.76              | 2.53              | 3.90 |
| <b>11j</b> | 390.06  | 5   | 2   | 61.8                   | 5    | -3.86              | 2.52              | 3.98 |
| <b>11k</b> | 342.16  | 6   | 2   | 71.03                  | 6    | -3.46              | 2.29              | 2.88 |
| <b>11l</b> | 342.16  | 6   | 2   | 71.03                  | 6    | -3.92              | 2.42              | 3.02 |
| <b>11m</b> | 342.16  | 6   | 2   | 71.03                  | 6    | -3.56              | 2.29              | 2.70 |
| <b>12a</b> | 327.16  | 6   | 3   | 73.83                  | 6    | -3.54              | 1.81              | 1.59 |
| <b>12b</b> | 345.15  | 6   | 3   | 73.83                  | 6    | -3.98              | 2.09              | 1.99 |
| <b>12c</b> | 345.15  | 6   | 3   | 73.83                  | 6    | -3.94              | 2.09              | 1.85 |
| <b>12d</b> | 345.15  | 6   | 3   | 73.83                  | 6    | -3.78              | 1.95              | 1.68 |
| <b>12e</b> | 361.12  | 6   | 3   | 73.83                  | 6    | -4.63              | 2.41              | 2.59 |
| <b>12f</b> | 361.12  | 6   | 3   | 73.83                  | 6    | -4.86              | 2.38              | 2.63 |
| <b>12g</b> | 361.12  | 6   | 3   | 73.83                  | 6    | -4.91              | 2.33              | 2.61 |
| <b>12h</b> | 405.07  | 6   | 3   | 73.83                  | 6    | -4.59              | 2.27              | 2.42 |
| <b>12i</b> | 405.07  | 6   | 3   | 73.83                  | 6    | -4.92              | 2.24              | 2.48 |
| <b>12j</b> | 405.07  | 6   | 3   | 73.83                  | 6    | -5.05 <sup>a</sup> | 2.28              | 2.62 |
| <b>12k</b> | 357.17  | 7   | 3   | 83.06                  | 7    | -3.70              | 1.91              | 1.62 |
| <b>12l</b> | 357.17  | 7   | 3   | 83.06                  | 7    | -4.07              | 1.97              | 1.72 |
| <b>12m</b> | 357.17  | 7   | 3   | 83.06                  | 7    | -3.97              | 1.84              | 1.55 |
| <b>19a</b> | 325.17  | 4   | 1   | 47.56                  | 6    | -4.49              | 3.37 <sup>a</sup> | 3.58 |
| <b>19b</b> | 343.16  | 4   | 1   | 47.56                  | 6    | -4.66              | 3.46 <sup>a</sup> | 3.94 |

|            |        |   |   |       |   |                    |                   |      |
|------------|--------|---|---|-------|---|--------------------|-------------------|------|
| <b>19c</b> | 343.16 | 4 | 1 | 47.56 | 6 | -5.08 <sup>a</sup> | 3.51 <sup>a</sup> | 4.09 |
| <b>19d</b> | 343.16 | 4 | 1 | 47.56 | 6 | -4.87              | 3.46 <sup>a</sup> | 3.90 |
| <b>19e</b> | 359.13 | 4 | 1 | 47.56 | 6 | -5.19 <sup>a</sup> | 3.67 <sup>a</sup> | 4.23 |
| <b>19f</b> | 359.13 | 4 | 1 | 47.56 | 6 | -5.40 <sup>a</sup> | 3.69 <sup>a</sup> | 4.37 |
| <b>19g</b> | 359.13 | 4 | 1 | 47.56 | 6 | -5.39 <sup>a</sup> | 3.73 <sup>a</sup> | 4.40 |
| <b>19h</b> | 403.08 | 4 | 1 | 47.56 | 6 | -5.04 <sup>a</sup> | 3.61 <sup>a</sup> | 4.16 |
| <b>19i</b> | 403.08 | 4 | 1 | 47.56 | 6 | -5.40 <sup>a</sup> | 3.71 <sup>a</sup> | 4.38 |
| <b>19j</b> | 403.08 | 4 | 1 | 47.56 | 6 | -5.53 <sup>a</sup> | 3.79 <sup>a</sup> | 4.41 |
| <b>19k</b> | 355.18 | 5 | 1 | 56.79 | 7 | -4.61              | 3.38 <sup>a</sup> | 3.50 |
| <b>19l</b> | 355.18 | 5 | 1 | 56.79 | 7 | -4.85              | 3.45 <sup>a</sup> | 3.64 |
| <b>19m</b> | 355.18 | 5 | 1 | 56.79 | 7 | -4.72              | 3.40 <sup>a</sup> | 3.50 |
| <b>20a</b> | 311.15 | 4 | 2 | 58.56 | 5 | -3.61              | 2.53              | 3.42 |
| <b>20b</b> | 329.14 | 4 | 2 | 58.56 | 5 | -4.09              | 2.86              | 3.93 |
| <b>20c</b> | 329.14 | 4 | 2 | 58.56 | 5 | -4.12              | 2.90              | 3.95 |
| <b>20d</b> | 329.14 | 4 | 2 | 58.56 | 5 | -4.12              | 2.90              | 3.93 |
| <b>20e</b> | 345.11 | 4 | 2 | 58.56 | 5 | -3.98              | 2.79              | 4.04 |
| <b>20f</b> | 345.11 | 4 | 2 | 58.56 | 5 | -3.95              | 2.84              | 4.16 |
| <b>20g</b> | 345.11 | 4 | 2 | 58.56 | 5 | -3.93              | 2.87              | 4.21 |
| <b>20h</b> | 389.06 | 4 | 2 | 58.56 | 5 | -3.99              | 2.78              | 4.08 |
| <b>20i</b> | 389.06 | 4 | 2 | 58.56 | 5 | -3.89              | 2.83              | 4.28 |
| <b>20j</b> | 389.06 | 4 | 2 | 58.56 | 5 | -3.92              | 2.83              | 4.33 |
| <b>20k</b> | 341.16 | 5 | 2 | 67.79 | 6 | -3.82              | 2.55              | 3.29 |
| <b>20l</b> | 341.16 | 5 | 2 | 67.79 | 6 | -3.85              | 2.66              | 3.28 |
| <b>20m</b> | 341.16 | 5 | 2 | 67.79 | 6 | -3.53              | 2.54              | 3.00 |
| <b>21a</b> | 326.16 | 5 | 3 | 70.59 | 6 | -3.56              | 1.99              | 1.80 |
| <b>21b</b> | 344.15 | 5 | 3 | 70.59 | 6 | -4.05              | 2.34              | 2.26 |
| <b>21c</b> | 344.15 | 5 | 3 | 70.59 | 6 | -4.11              | 2.37              | 2.19 |
| <b>21d</b> | 344.15 | 5 | 3 | 70.59 | 6 | -3.92              | 2.27              | 2.07 |
| <b>21e</b> | 360.12 | 5 | 3 | 70.59 | 6 | -4.66              | 2.60              | 2.58 |
| <b>21f</b> | 360.12 | 5 | 3 | 70.59 | 6 | -4.87              | 2.69              | 2.73 |
| <b>21g</b> | 360.12 | 5 | 3 | 70.59 | 6 | -4.75              | 2.74              | 2.75 |
| <b>21h</b> | 404.07 | 5 | 3 | 70.59 | 6 | -4.61              | 2.47              | 2.43 |
| <b>21i</b> | 404.07 | 5 | 3 | 70.59 | 6 | -4.88              | 2.66              | 2.68 |
| <b>21j</b> | 404.07 | 5 | 3 | 70.59 | 6 | -4.94              | 2.70              | 2.73 |
| <b>21k</b> | 356.17 | 6 | 3 | 79.82 | 7 | -3.77              | 2.07              | 1.87 |
| <b>21l</b> | 356.17 | 6 | 3 | 79.82 | 7 | -3.93              | 2.09              | 1.85 |
| <b>21m</b> | 356.17 | 6 | 3 | 79.82 | 7 | -3.63              | 1.99              | 1.66 |
| <b>23</b>  | 374.14 | 5 | 0 | 42.01 | 6 | -4.70              | 3.76 <sup>a</sup> | 4.02 |
| <b>24</b>  | 360.12 | 5 | 1 | 53.01 | 5 | -4.28              | 2.66              | 3.73 |
| <b>25</b>  | 375.13 | 6 | 2 | 65.04 | 6 | -4.51              | 2.63              | 2.69 |

Heading abbreviations: MW = molecular weight; nHA = number of hydrogen bond acceptors; nHD = number of hydrogen bond donors; TPSA = topological polar surface area; nRot = number of rotatable bonds.

<sup>a</sup> Outside of optimal range (logS -1 to -5, logD 1 to 3)

**Table S11.** Scores of common ADMET properties calculated for all synthesised compounds. Data were calculated using ADMETlab 3.0.<sup>5</sup> Values of columns 3-6 are probability scores with a range from 0 to 1 on a probability scale; values of column 2 are on a logarithmic scale.

| Compound   | Caco-2 <sup>a</sup> | Pgp inhibitor | Pgp substrate | hERG blocker <sup>b</sup> | Ames toxicity |
|------------|---------------------|---------------|---------------|---------------------------|---------------|
| <b>10a</b> | -5.11               | 0.45          | 0.03          | 0.57                      | 0.59          |
| <b>10b</b> | -5.31               | 0.52          | 0.01          | 0.48                      | 0.67          |
| <b>10c</b> | -4.98               | 0.70          | 0.02          | 0.56                      | 0.64          |
| <b>10d</b> | -4.94               | 0.86          | 0.02          | 0.58                      | 0.63          |
| <b>10e</b> | -4.96               | 0.70          | 0.00          | 0.55                      | 0.53          |
| <b>10f</b> | -4.81               | 0.50          | 0.02          | 0.68                      | 0.46          |
| <b>10g</b> | -4.78               | 0.75          | 0.01          | 0.72                      | 0.42          |
| <b>10h</b> | -5.12               | 0.90          | 0.00          | 0.37                      | 0.53          |
| <b>10i</b> | -4.90               | 0.73          | 0.01          | 0.56                      | 0.43          |
| <b>10j</b> | -4.92               | 0.78          | 0.01          | 0.62                      | 0.36          |
| <b>10k</b> | -5.07               | 0.77          | 0.02          | 0.51                      | 0.57          |
| <b>10l</b> | -4.94               | 0.58          | 0.02          | 0.59                      | 0.64          |
| <b>10m</b> | -4.92               | 0.34          | 0.04          | 0.58                      | 0.64          |
| <b>11a</b> | -5.10               | 0.00          | 0.03          | 0.38                      | 0.48          |
| <b>11b</b> | -5.36               | 0.00          | 0.01          | 0.30                      | 0.57          |
| <b>11c</b> | -5.25               | 0.01          | 0.03          | 0.37                      | 0.53          |
| <b>11d</b> | -5.20               | 0.01          | 0.02          | 0.39                      | 0.53          |
| <b>11e</b> | -5.13               | 0.00          | 0.00          | 0.36                      | 0.43          |
| <b>11f</b> | -5.06               | 0.00          | 0.02          | 0.49                      | 0.36          |
| <b>11g</b> | -5.01               | 0.01          | 0.01          | 0.54                      | 0.32          |
| <b>11h</b> | -5.59               | 0.02          | 0.00          | 0.21                      | 0.42          |
| <b>11i</b> | -5.32               | 0.01          | 0.01          | 0.37                      | 0.33          |
| <b>11j</b> | -5.36               | 0.01          | 0.01          | 0.43                      | 0.26          |
| <b>11k</b> | -5.09               | 0.01          | 0.02          | 0.32                      | 0.47          |
| <b>11l</b> | -5.11               | 0.00          | 0.03          | 0.40                      | 0.53          |
| <b>11m</b> | -5.14               | 0.00          | 0.04          | 0.39                      | 0.54          |
| <b>12a</b> | -5.07               | 0.11          | 0.16          | 0.71                      | 0.99          |
| <b>12b</b> | -5.24               | 0.14          | 0.04          | 0.63                      | 0.99          |
| <b>12c</b> | -5.07               | 0.26          | 0.15          | 0.70                      | 0.99          |
| <b>12d</b> | -5.09               | 0.45          | 0.13          | 0.71                      | 0.99          |
| <b>12e</b> | -5.21               | 0.27          | 0.01          | 0.69                      | 0.99          |
| <b>12f</b> | -4.99               | 0.13          | 0.11          | 0.80                      | 0.98          |
| <b>12g</b> | -5.02               | 0.30          | 0.07          | 0.82                      | 0.98          |
| <b>12h</b> | -5.23               | 0.60          | 0.00          | 0.52                      | 0.99          |
| <b>12i</b> | -4.97               | 0.29          | 0.09          | 0.70                      | 0.98          |
| <b>12j</b> | -4.99               | 0.39          | 0.06          | 0.75                      | 0.97          |
| <b>12k</b> | -5.43               | 0.31          | 0.10          | 0.66                      | 0.99          |
| <b>12l</b> | -5.13               | 0.17          | 0.15          | 0.73                      | 0.99          |
| <b>12m</b> | -5.17               | 0.07          | 0.23          | 0.72                      | 0.99          |
| <b>19a</b> | -4.98               | 0.88          | 0.02          | 0.49                      | 0.49          |

|            |       |      |      |      |      |
|------------|-------|------|------|------|------|
| <b>19b</b> | -5.09 | 0.90 | 0.00 | 0.41 | 0.58 |
| <b>19c</b> | -4.92 | 0.95 | 0.02 | 0.48 | 0.54 |
| <b>19d</b> | -4.91 | 0.98 | 0.01 | 0.50 | 0.53 |
| <b>19e</b> | -4.91 | 0.94 | 0.00 | 0.47 | 0.43 |
| <b>19f</b> | -4.82 | 0.90 | 0.01 | 0.61 | 0.36 |
| <b>19g</b> | -4.81 | 0.96 | 0.01 | 0.65 | 0.32 |
| <b>19h</b> | -5.07 | 0.98 | 0.00 | 0.30 | 0.43 |
| <b>19i</b> | -4.85 | 0.96 | 0.01 | 0.48 | 0.33 |
| <b>19j</b> | -4.85 | 0.97 | 0.01 | 0.54 | 0.27 |
| <b>19k</b> | -4.97 | 0.96 | 0.01 | 0.43 | 0.47 |
| <b>19l</b> | -4.86 | 0.90 | 0.02 | 0.52 | 0.54 |
| <b>19m</b> | -4.86 | 0.79 | 0.02 | 0.51 | 0.54 |
| <b>20a</b> | -5.01 | 0.02 | 0.01 | 0.32 | 0.37 |
| <b>20b</b> | -5.19 | 0.03 | 0.00 | 0.25 | 0.46 |
| <b>20c</b> | -5.12 | 0.06 | 0.01 | 0.31 | 0.42 |
| <b>20d</b> | -5.10 | 0.12 | 0.00 | 0.33 | 0.41 |
| <b>20e</b> | -5.04 | 0.05 | 0.00 | 0.30 | 0.32 |
| <b>20f</b> | -4.96 | 0.03 | 0.01 | 0.43 | 0.26 |
| <b>20g</b> | -4.95 | 0.06 | 0.00 | 0.47 | 0.23 |
| <b>20h</b> | -5.42 | 0.16 | 0.00 | 0.17 | 0.32 |
| <b>20i</b> | -5.22 | 0.06 | 0.00 | 0.31 | 0.24 |
| <b>20j</b> | -5.28 | 0.10 | 0.00 | 0.36 | 0.18 |
| <b>20k</b> | -5.00 | 0.07 | 0.00 | 0.26 | 0.35 |
| <b>20l</b> | -5.08 | 0.03 | 0.01 | 0.34 | 0.42 |
| <b>20m</b> | -5.10 | 0.01 | 0.01 | 0.33 | 0.43 |
| <b>21a</b> | -5.09 | 0.76 | 0.03 | 0.53 | 0.98 |
| <b>21b</b> | -5.19 | 0.80 | 0.01 | 0.44 | 0.99 |
| <b>21c</b> | -5.11 | 0.90 | 0.03 | 0.51 | 0.99 |
| <b>21d</b> | -5.11 | 0.95 | 0.02 | 0.54 | 0.99 |
| <b>21e</b> | -5.28 | 0.90 | 0.00 | 0.51 | 0.98 |
| <b>21f</b> | -5.06 | 0.78 | 0.02 | 0.64 | 0.97 |
| <b>21g</b> | -5.08 | 0.90 | 0.01 | 0.68 | 0.97 |
| <b>21h</b> | -5.23 | 0.97 | 0.00 | 0.33 | 0.98 |
| <b>21i</b> | -5.02 | 0.90 | 0.02 | 0.52 | 0.97 |
| <b>21j</b> | -5.05 | 0.93 | 0.01 | 0.58 | 0.96 |
| <b>21k</b> | -5.35 | 0.91 | 0.01 | 0.46 | 0.98 |
| <b>21l</b> | -5.06 | 0.82 | 0.03 | 0.55 | 0.99 |
| <b>21m</b> | -5.04 | 0.61 | 0.04 | 0.54 | 0.99 |
| <b>23</b>  | -5.02 | 0.45 | 0.20 | 0.33 | 0.52 |
| <b>24</b>  | -5.17 | 0.00 | 0.06 | 0.16 | 0.42 |
| <b>25</b>  | -5.12 | 0.11 | 0.66 | 0.39 | 0.98 |

<sup>a</sup> Caco-2 values are log units; optimal results are >-5.15. <sup>b</sup> Values are probability of being hERG blockers where IC<sub>50</sub> ≤ 10 μM.

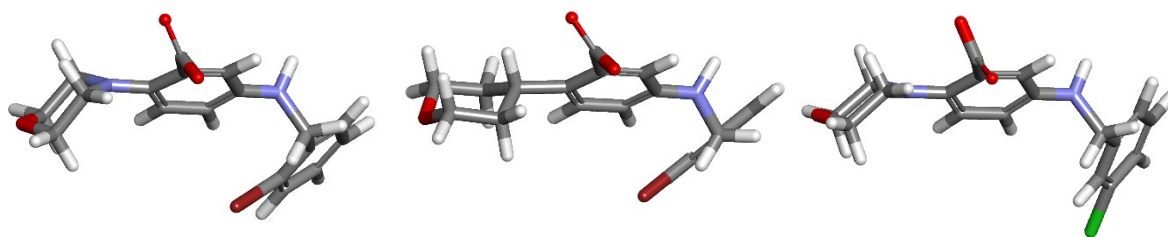

**Figure S4.** Comparison of binding conformations with alkyl ring modification. Left to right: compound **1c**, **20h**, **1b**. Between **20h** and the other compounds, being its corresponding morpholinyl analogue (**1c**) and most potent inhibitor **1b**, a chair flip of the alkyl ring can be seen. Between **1b** and the other two compounds, the carbonyl group has been rotated.

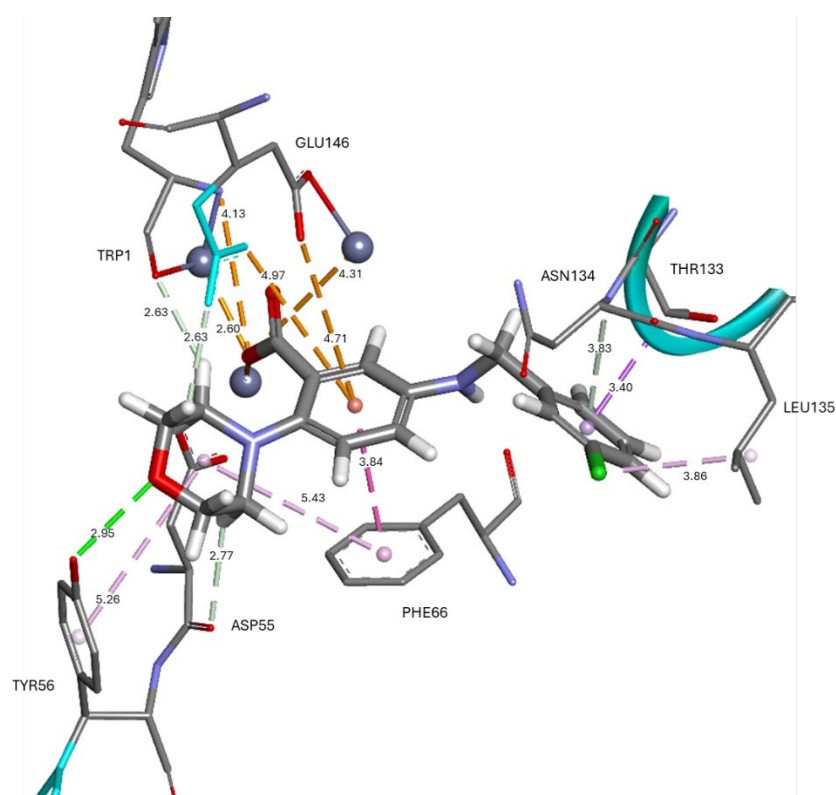

**Figure S5.** Interactions and distances between **1b** and PC-PLC<sub>B</sub>. Waters omitted for clarity.

**Table S12.** Interactions and distances between **1b** and PC-PLC<sub>B</sub>.

| Protein Residue | Interaction Type               | Distance (Å)     |
|-----------------|--------------------------------|------------------|
| Leu135          | $\pi$ -alkyl                   | 3.86             |
| Asn134          | $\pi$ -donor H bond            | 3.85             |
| Thr133          | $\pi$ -sigma                   | 3.40             |
| Phe66           | $\pi$ -alkyl and $\pi$ - $\pi$ | 5.43 and 3.84    |
| Zn247           | Attractive charge              | 4.31             |
| Zn246           | Attractive charge              | 2.34             |
| Zn248           | Attractive charge              | 2.60             |
| Glu146          | C-H bond, $\pi$ -anion bonds   | 2.63, 4.71, 4.97 |
| Trp1            | C-H bond                       | 2.63             |
| Tyr56           | H bond                         | 2.95             |

**Table S13.** Interactions and distances between **1b** and active waters of PC-PLC<sub>BC</sub>.

| Water molecule | Interaction type                 | Distance (Å)        |
|----------------|----------------------------------|---------------------|
| HOH258         | Unfavourable x 5                 | 1.02 – 1.47         |
| HOH341         | Unfavourable x 2                 | 1.58 and 1.86       |
| HOH249         | Favourable x 1, unfavourable x 1 | 2.82, 0.54          |
| HOH250         | Favourable, unfavourable x 2     | 2.74, 2.02 and 1.24 |
| HOH452         | Unfavourable x 3                 | 1.55 – 1.91         |
| HOH251         | Unfavourable x 4                 | 1.56 – 2.04         |
| HOH254         | Favourable                       | 1.75                |
| HOH256         | Unfavourable x 6                 | 1.20 – 1.78         |
| HOH318         | Unfavourable x 2                 | 0.93 and 1.75       |

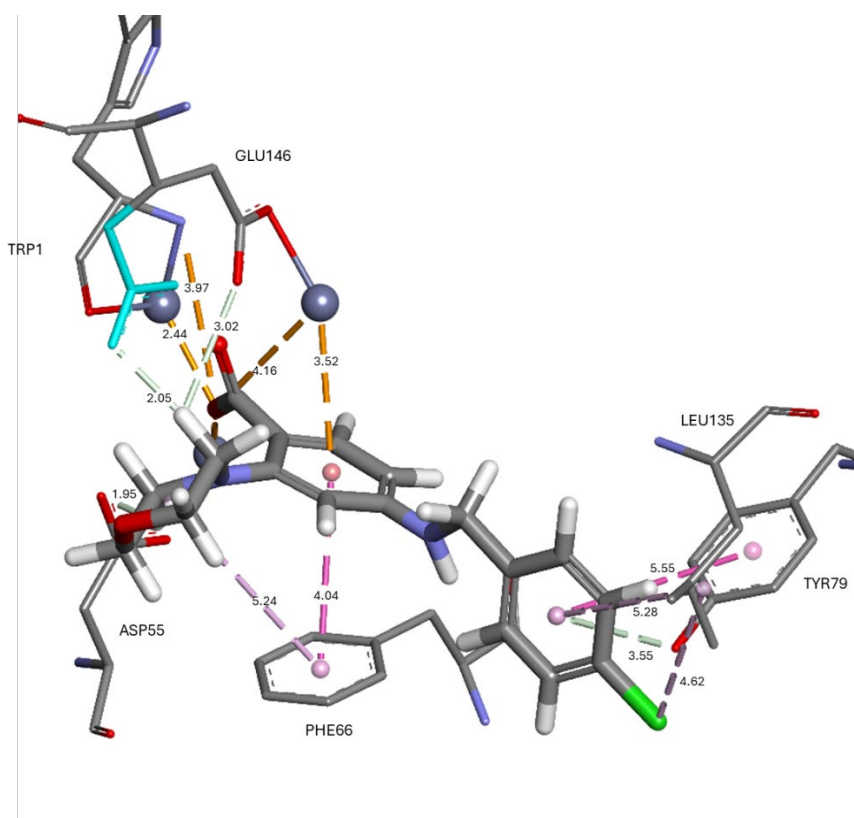**Figure S6.** Interactions and distances between **20h** and PC-PLC<sub>BC</sub>. Waters omitted for clarity.**Table S14.** Interactions and distances between **20h** and PC-PLC<sub>BC</sub> as compared with **1b**.

| Protein Residue | Interaction Type               | Distance (Å)  |
|-----------------|--------------------------------|---------------|
| Leu135          | Absent                         | -             |
| Asn134          | Absent                         | -             |
| Thr133          | Absent                         | -             |
| Phe66           | $\pi$ -alkyl and $\pi$ - $\pi$ | 5.35 and 3.96 |
| Zn247           | Attractive charge              | 2.30          |
| Zn246           | Attractive charge              | 4.23          |
| Zn248           | Attractive charge              | 2.56          |
| Glu146          | C-H bond, $\pi$ -anion bonds   | 3.08 and 4.64 |
| Trp1            | Absent                         | -             |
| Tyr56           | H bond                         | 2.95          |
| Ala3*           | Alkyl                          | 5.30          |

\* interaction not observed in **1b**

**Table S15.** Interactions and distances between **20h** and active waters of PC-PLC<sub>BC</sub>.

| Water molecule | Interaction type (x quantity)    | Distance (Å)  |
|----------------|----------------------------------|---------------|
| HOH258         | Unfavourable x 3                 | 1.02 – 2.0    |
| HOH341         | Unfavourable x 4                 | 0.85 – 2.18   |
| HOH249         | Unfavourable x 2                 | 0.58 and 1.66 |
| HOH250         | Unfavourable x 3                 | 0.55 – 1.88   |
| HOH452         | Unfavourable x 2                 | 1.74 – 1.87   |
| HOH251         | Unfavourable x 4                 | 1.31 – 2.02   |
| HOH254         | Favourable x 1, unfavourable x 1 | 1.66 and 2.06 |
| HOH256         | Unfavourable x 4                 | 0.92 – 1.58   |
| HOH318         | Unfavourable x 2                 | 1.16 and 1.58 |

## References

- (1) Hough, E.; Hansen, L. K.; Birknes, B.; Jynge, K.; Hansen, S.; Hordvik, A.; Little, C.; Dodson, E.; Derewenda, Z. High-Resolution (1.5 Å) Crystal Structure of Phospholipase C from *Bacillus Cereus*. *Nature* **1989**, *338* (6213), 357–360. <https://doi.org/10.1038/338357a0>.
- (2) Yoon, S.; Eom, G. H. HDAC and HDAC Inhibitor: From Cancer to Cardiovascular Diseases. *Chonnam Med. J.* **2016**, *52* (1), 1–11. <https://doi.org/10.4068/cmj.2016.52.1.1>.
- (3) R Core Team. R: A Language and Environment for Statistical Computing, 2024. <https://www.R-project.org/>.
- (4) Guha, R. Chemical Informatics Functionality in R. *J. Stat. Softw.* **2007**, *18*, 1–16. <https://doi.org/10.18637/jss.v018.i05>.
- (5) Fu, L.; Shi, S.; Yi, J.; Wang, N.; He, Y.; Wu, Z.; Peng, J.; Deng, Y.; Wang, W.; Wu, C.; Lyu, A.; Zeng, X.; Zhao, W.; Hou, T.; Cao, D. ADMETlab 3.0: An Updated Comprehensive Online ADMET Prediction Platform Enhanced with Broader Coverage, Improved Performance, API Functionality and Decision Support. *Nucleic Acids Res.* **2024**, *52* (W1), W422–W431. <https://doi.org/10.1093/nar/gkae236>.
- (6) Baell, J. B.; Holloway, G. A. New Substructure Filters for Removal of Pan Assay Interference Compounds (PAIS) from Screening Libraries and for Their Exclusion in Bioassays. *J. Med. Chem.* **2010**, *53* (7), 2719–2740. <https://doi.org/10.1021/jm901137j>.
- (7) Lipinski, C. A. Lead- and Drug-like Compounds: The Rule-of-Five Revolution. *Drug Discov. Today Technol.* **2004**, *1* (4), 337–341. <https://doi.org/10.1016/j.ddtec.2004.11.007>.
- (8) Lipinski, C. A.; Lombardo, F.; Dominy, B. W.; Feeney, P. J. Experimental and Computational Approaches to Estimate Solubility and Permeability in Drug Discovery and Development Settings. *Adv. Drug Deliv. Rev.* **2001**, *46* (1), 3–26. [https://doi.org/10.1016/S0169-409X\(00\)00129-0](https://doi.org/10.1016/S0169-409X(00)00129-0).
- (9) Veber, D. F.; Johnson, S. R.; Cheng, H.-Y.; Smith, B. R.; Ward, K. W.; Kopple, K. D. Molecular Properties That Influence the Oral Bioavailability of Drug Candidates. *J. Med. Chem.* **2002**, *45* (12), 2615–2623. <https://doi.org/10.1021/jm020017n>.
- (10) Jorgensen, W. L.; Duffy, E. M. Prediction of Drug Solubility from Structure. *Adv. Drug Deliv. Rev.* **2002**, *54* (3), 355–366. [https://doi.org/10.1016/S0169-409X\(02\)00008-X](https://doi.org/10.1016/S0169-409X(02)00008-X).
- (11) Comer, J. E. A. High-Throughput Measurement of Log D and pKa. In *Drug Bioavailability*; John Wiley & Sons, Ltd, 2003; pp 21–45. <https://doi.org/10.1002/3527601473.ch2>.
